# Supplementary material for: Discovery of Metabolic Biomarkers for Duchenne Muscular Dystrophy within a Natural History Study
Source: PLoS One. 2016 Apr 15;11(4):e0153461. doi: 10.1371/journal.pone.0153461 (PMC4833348; doi:10.1371/journal.pone.0153461)
Supplement: S3 Table — Drugs and non-human metabolites are shown in red. The most likely annotations are highlighted. (XLSX) [file pone.0153461.s006.xlsx]

## Sheet: S3 Table
Median m/z value in study	Predicted compound ID (HMDB or Metlin)	Name of predicted compound	Predicted adduct	Predicted adduct molecular weight (Da)	Predicted compound molecular weight (Da)		ppm between input and predicted adduct
132.077	HMDB00064	Creatine	M+H	132.077	131.069		3
132.077	HMDB13222	Beta-Guanidinopropionic acid	M+H	132.077	131.069		3
132.077	HMDB29722	1,2,5-Trimethyl-1H-pyrrole	M+Na	132.078	109.089		9
132.077	44712	3-Guanidinopropanoate	M+H	132.077	131.07		3
132.077	7	Creatine	M+H	132.077	131.07		3
312.014	HMDB15420	Quinethazone	M+Na	312.018	289.029	drug	11
312.014	HMDB14959	Carprofen	M+K	312.019	273.056	drug	14
312.014	HMDB60542	5-Hydroxydiclofenac	M+H	312.019	311.012	drug metabolite	14
312.014	HMDB13976	3'-Hydroxydiclofenac	M+H	312.019	311.012	drug metabolite	14
312.014	HMDB13974	4'-Hydroxydiclofenac	M+H	312.019	311.012	drug metabolite	14
312.014	68841	Flurochloridone	M+H	312.019	311.009		6
114.067	HMDB00562	Creatinine	M+H	114.066	113.059		5
114.067	72998	3-(N-Nitrosomethylamino)propionitrile	M+H	114.066	113.059		5
114.067	8	Creatinine	M+H	114.066	113.059		5
270.316	HMDB29586	Octadecylamine	M+H	270.316	269.308		1
270.316	24042	1-Octadecanamine	M+H	270.316	269.308		1
451.165	HMDB14355	Adapalene	M+K	451.167	412.204		3
451.165	HMDB00569	Deoxypyridinoline	M+K	451.159	412.196		14
451.165	HMDB41522	3-Isomangostin hydrate	M+Na	451.173	428.184		16
451.165	HMDB41198	Edulisin V	M+Na	451.173	428.184		16
451.165	HMDB40836	Heteroflavanone B	M+Na	451.173	428.184		16
451.165	HMDB33332	Garcinone D	M+Na	451.173	428.184		16
451.165	HMDB40691	3'-(1''-(3-Methylbutanoyl))-angeloyl vaginidiol	M+Na	451.173	428.184		16
451.165	HMDB29984	1-Isomangostin hydrate	M+Na	451.173	428.184		16
451.165	HMDB39636	Abscisic alcohol 11-glucoside	M+K	451.173	412.21		16
451.165	HMDB30082	5-(2,3-Dihydroxy-3-methylbutyl)-4-(3,4-epoxy-4-methylpentanoyl)-3,4-dihydroxy-2-isopentanoyl-2-cyclopenten-1-one	M+K	451.173	412.21		16
451.165	19447	Trp Met Asp	M+H	451.165	450.157		1
451.165	18764	Trp Asp Met	M+H	451.165	450.157		1
451.165	18421	Met Asp Trp	M+H	451.165	450.157		1
451.165	17104	Asp Trp Met	M+H	451.165	450.157		1
451.165	16137	Met Trp Asp	M+H	451.165	450.157		1
451.165	15680	Asp Met Trp	M+H	451.165	450.157		1
451.165	120616	Asp Asp Thr Thr	M+H	451.165	450.16		3
451.165	120996	Asp Glu Ser Thr	M+H	451.165	450.16		3
451.165	121015	Asp Glu Thr Ser	M+H	451.165	450.16		3
451.165	125556	Asp Ser Glu Thr	M+H	451.165	450.16		3
451.165	125803	Asp Ser Thr Glu	M+H	451.165	450.16		3
451.165	125936	Asp Thr Asp Thr	M+H	451.165	450.16		3
451.165	125955	Asp Thr Glu Ser	M+H	451.165	450.16		3
451.165	126183	Asp Thr Ser Glu	M+H	451.165	450.16		3
451.165	126202	Asp Thr Thr Asp	M+H	451.165	450.16		3
451.165	128596	Glu Asp Ser Thr	M+H	451.165	450.16		3
451.165	128615	Glu Asp Thr Ser	M+H	451.165	450.16		3
451.165	128995	Glu Glu Ser Ser	M+H	451.165	450.16		3
451.165	133536	Glu Ser Asp Thr	M+H	451.165	450.16		3
451.165	133555	Glu Ser Glu Ser	M+H	451.165	450.16		3
451.165	133783	Glu Ser Ser Glu	M+H	451.165	450.16		3
451.165	133802	Glu Ser Thr Asp	M+H	451.165	450.16		3
451.165	133935	Glu Thr Asp Ser	M+H	451.165	450.16		3
451.165	134182	Glu Thr Ser Asp	M+H	451.165	450.16		3
451.165	224355	Ser Asp Glu Thr	M+H	451.165	450.16		3
451.165	224602	Ser Asp Thr Glu	M+H	451.165	450.16		3
451.165	224735	Ser Glu Asp Thr	M+H	451.165	450.16		3
451.165	224754	Ser Glu Glu Ser	M+H	451.165	450.16		3
451.165	224982	Ser Glu Ser Glu	M+H	451.165	450.16		3
451.165	225001	Ser Glu Thr Asp	M+H	451.165	450.16		3
451.165	229542	Ser Ser Glu Glu	M+H	451.165	450.16		3
451.165	229922	Ser Thr Asp Glu	M+H	451.165	450.16		3
451.165	229941	Ser Thr Glu Asp	M+H	451.165	450.16		3
451.165	232335	Thr Asp Asp Thr	M+H	451.165	450.16		3
451.165	232354	Thr Asp Glu Ser	M+H	451.165	450.16		3
451.165	232582	Thr Asp Ser Glu	M+H	451.165	450.16		3
451.165	232601	Thr Asp Thr Asp	M+H	451.165	450.16		3
451.165	232734	Thr Glu Asp Ser	M+H	451.165	450.16		3
451.165	232981	Thr Glu Ser Asp	M+H	451.165	450.16		3
451.165	237522	Thr Ser Asp Glu	M+H	451.165	450.16		3
451.165	237541	Thr Ser Glu Asp	M+H	451.165	450.16		3
451.165	237921	Thr Thr Asp Asp	M+H	451.165	450.16		3
451.165	115736	Cys Met Pro Thr	M+H	451.165	450.161		5
451.165	115812	Cys Met Thr Pro	M+H	451.165	450.161		5
451.165	116496	Cys Pro Met Thr	M+H	451.165	450.161		5
451.165	116610	Cys Pro Thr Met	M+H	451.165	450.161		5
451.165	118092	Cys Thr Met Pro	M+H	451.165	450.161		5
451.165	118130	Cys Thr Pro Met	M+H	451.165	450.161		5
451.165	184135	Met Cys Pro Thr	M+H	451.165	450.161		5
451.165	184211	Met Cys Thr Pro	M+H	451.165	450.161		5
451.165	188315	Met Pro Cys Thr	M+H	451.165	450.161		5
451.165	188600	Met Pro Thr Cys	M+H	451.165	450.161		5
451.165	189911	Met Thr Cys Pro	M+H	451.165	450.161		5
451.165	190120	Met Thr Pro Cys	M+H	451.165	450.161		5
451.165	200095	Pro Cys Met Thr	M+H	451.165	450.161		5
451.165	200209	Pro Cys Thr Met	M+H	451.165	450.161		5
451.165	203515	Pro Met Cys Thr	M+H	451.165	450.161		5
451.165	203800	Pro Met Thr Cys	M+H	451.165	450.161		5
451.165	205909	Pro Thr Cys Met	M+H	451.165	450.161		5
451.165	206080	Pro Thr Met Cys	M+H	451.165	450.161		5
451.165	232091	Thr Cys Met Pro	M+H	451.165	450.161		5
451.165	232129	Thr Cys Pro Met	M+H	451.165	450.161		5
451.165	235511	Thr Met Cys Pro	M+H	451.165	450.161		5
451.165	235720	Thr Met Pro Cys	M+H	451.165	450.161		5
451.165	236309	Thr Pro Cys Met	M+H	451.165	450.161		5
451.165	236480	Thr Pro Met Cys	M+H	451.165	450.161		5
451.165	64728	A 922500	M+H	451.165	428.174		5
451.165	64832	Adapalene	M+H	451.165	412.204		3
451.165	96476	16(R)-AFP 07 (free acid)	M+H	451.165	412.206		8
451.165	96511	AFP 07 (free acid)	M+H	451.165	412.206		8
174.149	35938	3R-aminononanoic acid	M+H	174.149	173.142		3
174.149	64739	(+)-Muscarine	M+H	174.149	173.142		3
174.149	74863	9-amino-nonanoic acid	M+H	174.149	173.142		3
174.149	74872	Nonanoic acid, 3-amino-, (R)-	M+H	174.149	173.142		3
209.118	HMDB31469	trans-Isoasarone	M+H	209.117	208.11		3
209.118	HMDB33778	Elemicin	M+H	209.117	208.11		3
209.118	HMDB29872	gamma-Asarone	M+H	209.117	208.11		3
209.118	HMDB30197	(Z)-3-Oxo-2-(2-pentenyl)-1-cyclopenteneacetic acid	M+H	209.117	208.11		3
209.118	HMDB34991	4-Methoxybenzyl butanoate	M+H	209.117	208.11		3
209.118	HMDB41411	3,4-Dihydro-6-methoxy-2,2-dimethyl-2H-1-benzopyran-4-ol	M+H	209.117	208.11		3
209.118	HMDB40218	2-Phenoxyethyl isobutyrate	M+H	209.117	208.11		3
209.118	HMDB30150	Jasmine ketolactone	M+H	209.117	208.11		3
209.118	HMDB29867	Isoelemicin	M+H	209.117	208.11		3
209.118	HMDB40225	Isoamyl salicylate	M+H	209.117	208.11		3
209.118	HMDB30681	5-Deoxydiplosporin	M+H	209.117	208.11		3
209.118	HMDB35224	3,4-Dihydro-6-methoxy-3,7-dimethyl-1H-2-benzopyran-8-ol	M+H	209.117	208.11		3
209.118	HMDB38604	Amyl salicylate	M+H	209.117	208.11		3
209.118	66209	Benzyl (2R,3S)-2-methyl-3-hydroxybutanoate	M+H	209.117	208.11		3
209.118	66210	Benzyl (2S,3S)-2-methyl-3-hydroxybutanoate	M+H	209.117	208.11		3
209.118	68298	Primin	M+H	209.117	208.11		3
209.118	68320	beta-Asarone	M+H	209.117	208.11		3
209.118	68334	Elemicin	M+H	209.117	208.11		3
209.118	71096	Coronafacic acid	M+H	209.117	208.11		3
209.118	71476	Isoelemicin	M+H	209.117	208.11		3
209.118	71915	2,4,5-Trimethoxy-1-allylbenzene	M+H	209.117	208.11		3
209.118	74733	12-oxo-5E,8E,10Z-dodecatrienoic acid	M+H	209.117	208.11		3
209.118	85070	a-Asarone	M+H	209.117	208.11		3
209.118	86758	Jasmine ketolactone	M+H	209.117	208.11		3
209.118	86789	(Z)-3-Oxo-2-(2-pentenyl)-1-cyclopenteneacetic acid	M+H	209.117	208.11		3
209.118	87138	5-Deoxydiplosporin	M+H	209.117	208.11		3
209.118	90355	4-Methoxybenzyl butanoate	M+H	209.117	208.11		3
209.118	90539	3,4-Dihydro-6-methoxy-3,7-dimethyl-1H-2-benzopyran-8-ol	M+H	209.117	208.11		3
209.118	93266	Amyl salicylate	M+H	209.117	208.11		3
209.118	94749	2-Phenoxyethyl isobutyrate	M+H	209.117	208.11		3
209.118	94756	Isoamyl salicylate	M+H	209.117	208.11		3
209.118	95810	3,4-Dihydro-6-methoxy-2,2-dimethyl-2H-1-benzopyran-4-ol	M+H	209.117	208.11		3
209.118	96360	(4-tert-Butyl-phenoxy)-acetic acid	M+H	209.117	208.11		3
209.118	2291	1-Cyclohexene-1-acrylic acid, 2,6,6-trimethyl-3-oxo-	M+H	209.117	208.11		3
432.239	23414	Ala Trp Arg	M+H	432.235	431.228		8
432.239	21889	Trp Ala Arg	M+H	432.235	431.228		8
432.239	20189	Arg Ala Trp	M+H	432.235	431.228		8
432.239	18110	Trp Arg Ala	M+H	432.235	431.228		8
432.239	16586	Ala Arg Trp	M+H	432.235	431.228		8
432.239	16474	Arg Trp Ala	M+H	432.235	431.228		8
357.25	22672	Pro Ile Lys	M+H	357.25	356.242		0
357.25	21549	Pro Lys Ile	M+H	357.25	356.242		0
357.25	21421	Lys Leu Pro	M+H	357.25	356.242		0
357.25	20527	Leu Pro Lys	M+H	357.25	356.242		0
357.25	20075	Lys Pro Leu	M+H	357.25	356.242		0
357.25	19772	Lys Pro Ile	M+H	357.25	356.242		0
357.25	19637	Pro Leu Lys	M+H	357.25	356.242		0
357.25	18717	Lys Ile Pro	M+H	357.25	356.242		0
357.25	18658	Pro Lys Leu	M+H	357.25	356.242		0
357.25	17636	Ile Lys Pro	M+H	357.25	356.242		0
357.25	17538	Leu Lys Pro	M+H	357.25	356.242		0
357.25	16048	Ile Pro Lys	M+H	357.25	356.242		0
